# Supplementary material
Source: HighWire-hosted journal article supplement (https://www.genetics.org/content/suppl/2016/01/28/genetics.115.183624)
Supplement: FigureS1.pdf [file FigureS1.pdf]

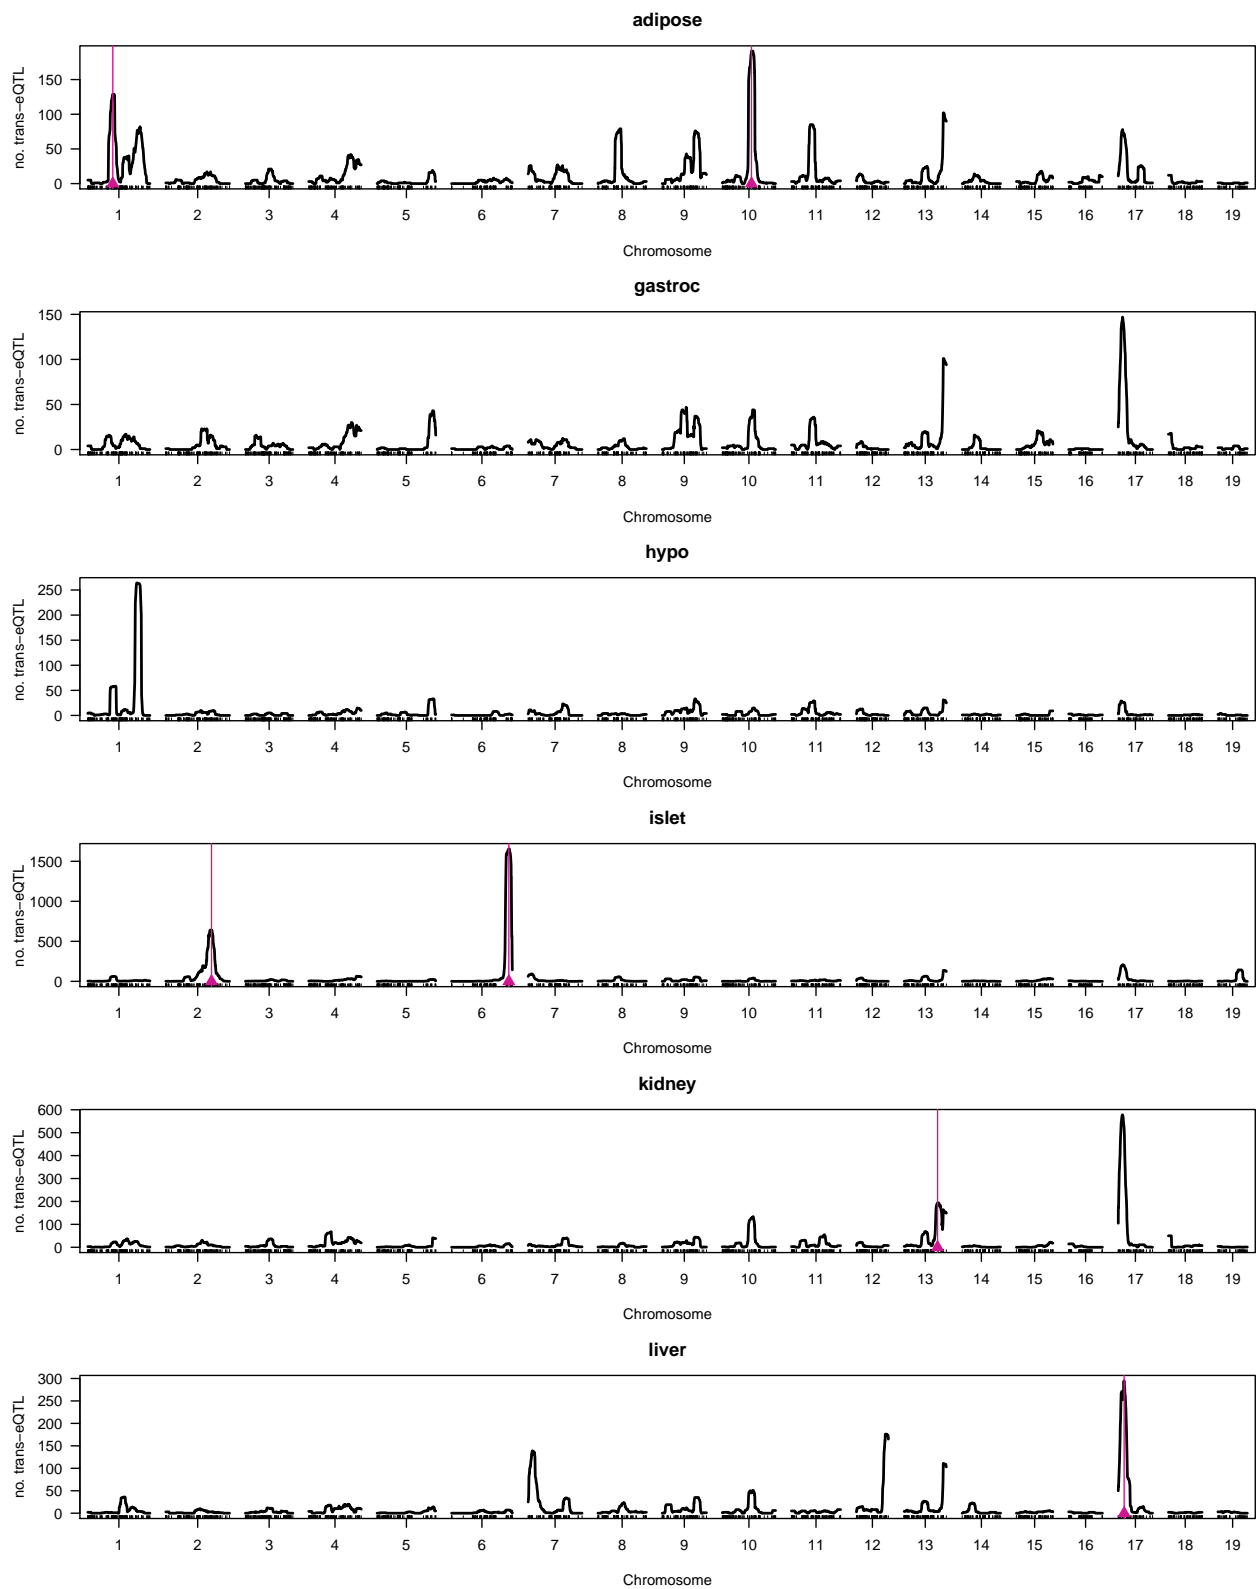

**Figure S1** Number of expression traits with  $\text{LOD} \geq 10$  in a 10 cM sliding window across the genome. Red triangles indicate the six *trans*-eQTL hotspots used as examples in Figures 2, 3, and 5.
